# Supplementary material
Source: HighWire-hosted journal article supplement (https://bmjopen.bmj.com/content/14/6/e079521)
Supplement: inline-supplementary-material-5 [file inline-supplementary-material-5.pdf]

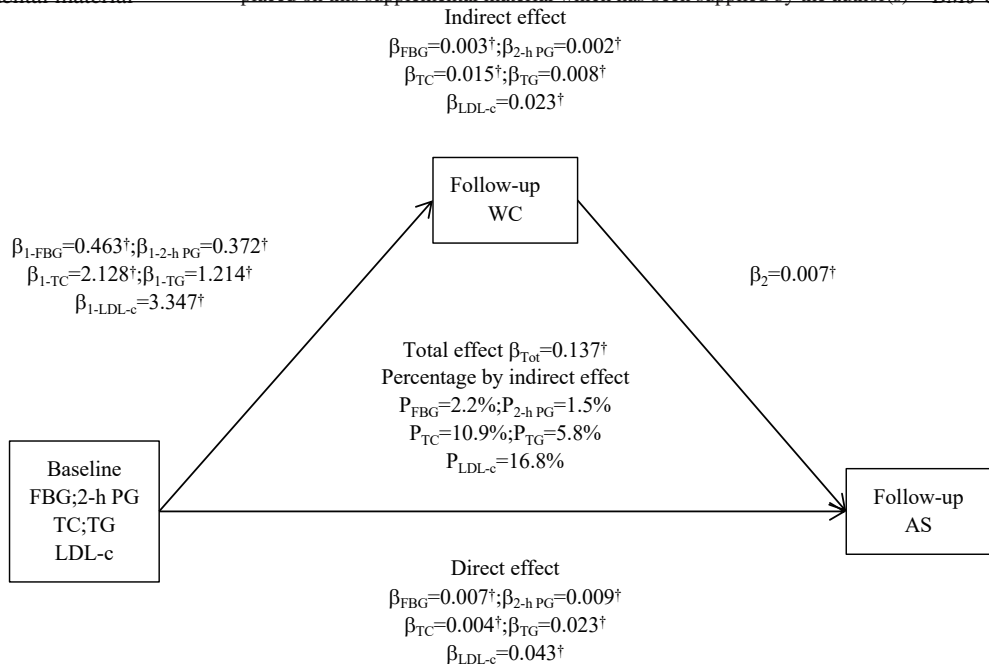

**Supplementary Figure S4** Multiple mediation analysis of the effects of baseline FBG, 2-h PG, TC, TG and LDL-c via follow-up WC on AS risk, adjusted for age, sex, drinking, smoking, labor intensity and total energy intake. Left and right baPWV were measured, and the average value was used for analysis, and baPWV was dichotomized at a cut-off point of baPWV=1,400 cm/s, representing different AS risk (baPWV≤1,400 cm/s was low risk, baPWV>1,400 cm/s was high AS risk).  $^\dagger p<0.05$  for coefficients being different from 0. FBG, fasting blood glucose; 2-h PG, 2-h postprandial glucose; TC, total cholesterol; TG, triglyceride; LDL-c, low-density lipoprotein cholesterol; BMI, body mass index.
